# Supplementary material for: One-Step Synthesis of Polyethyleneimine-Grafted Styrene-Maleic Anhydride Copolymer Adsorbents for Effective Adsorption of Anionic Dyes
Source: MDPI journal article supplement (doi:10.3390/molecules29081887), 2024-04-21
Supplement: s1 [file s1]

# **One-step synthesis of polyethyleneimine grafted styrene-maleic anhydride copolymer adsorbents for effective adsorption of anionic dyes**

Yao Xu<sup>a</sup>, Qinwen Wang<sup>a</sup>, Yuanbo Wang<sup>b</sup>, Falu Hu<sup>\*a</sup>, Bin Sun<sup>a, c</sup>, Tingting Gao<sup>\*a, c</sup>,

Guowei Zhou<sup>a</sup>

*<sup>a</sup> Key Laboratory of Fine Chemicals in Universities of Shandong, Jinan Engineering Laboratory for Multi-scale Functional Materials, School of Chemistry and Chemical Engineering, Qilu University of Technology (Shandong Academy of Sciences), Jinan 250353, China*

*<sup>b</sup> Shandong Land and Space Ecological Restoration Center, Jinan, China*

*<sup>c</sup> Shandong Laboratory of Advanced Materials and Green Manufacturing at Yantai, Yantai, China*

<sup>\*</sup>Corresponding author at: Daxue Road, Western University Science Park, Jinan

250353, Shandong, China. Tel: +86-13573103906

E-mail address: faluhu@qlu.edu.cn; ttgao@qlu.edu.cn

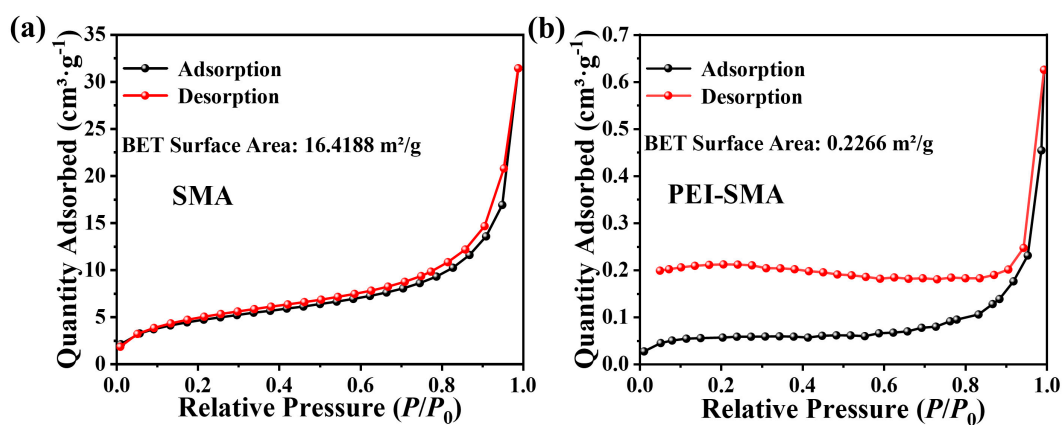

**Figure S1.** Characterization of  $N_2$  adsorption–desorption isotherms: (a) SMA, (b) PEI-SMA.

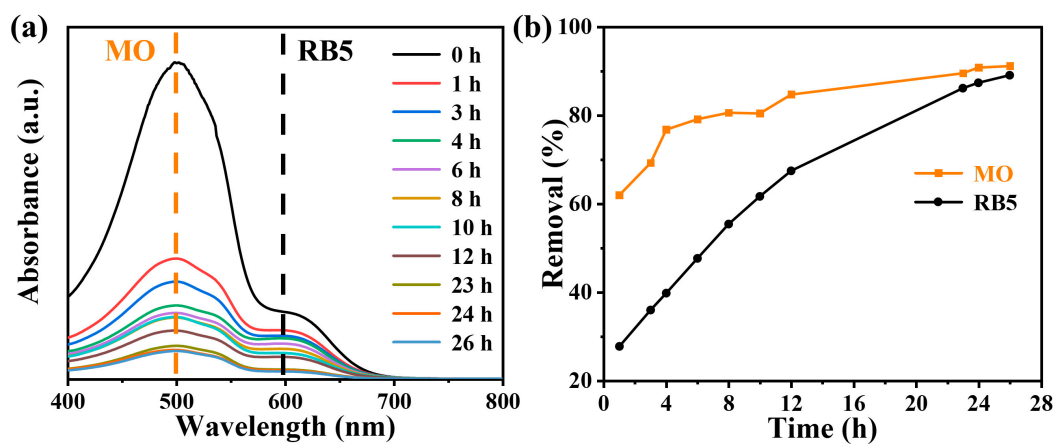

**Figure S2.** UV-vis spectra of (a) RB5/MO mixed solution with different contact time (RB5 and MO concentration =  $600 \text{ mg L}^{-1}$ , respectively;  $V = 200 \text{ mL}$ , dosage = 35 mg, contact time = 1560 min, temperature = 308 K, and pH = 2.0); (b) The relationship between the removal percentage of RB5 and MO in the mixed dye solutions and time.

**Table S1.** The BET specific surface area, pore volume, average pore diameter, meso- and micropore volume data of SMA and PEI-SMA.

| Parameters            | SMA                         | PEI-SMA                     |
|-----------------------|-----------------------------|-----------------------------|
| surface area          | 16.4188 m <sup>2</sup> /g   | 0.2266 m <sup>2</sup> /g    |
| pore volume           | 0.014067 cm <sup>3</sup> /g | 0.000928 cm <sup>3</sup> /g |
| average pore diameter | 43.084 Å                    | 30.8479 nm                  |
| mesopore volume       | 0.005105 cm <sup>3</sup> /g | 0.000605 cm <sup>3</sup> /g |
| micropore volume      | 0.001723 cm <sup>3</sup> /g | 0.000004 cm <sup>3</sup> /g |
